# Supplementary material for: Radiomics-based prediction of treatment response to TRuC-T cell therapy in patients with mesothelioma: a pilot study
Source: Research Square preprint supplement (doi:10.21203/rs.3.rs-3930436/v1), 2024-02-07
Supplement: Supplementary file 1 [file 02d13530afe045645eb49886.docx]

**Table 6: Radiomics features associated with volume-based response of target tumors**.

| **Organ** | **Radiomics** | | | **DRadiomics** | |
| --- | --- | --- | --- | --- | --- |
| W4 | W8 | W12 | W8 | W12 |
| **Pleura** | 185 (N=47) | 584 (N=38) | 290 (N=29) | 505 (N=38) | 221 (N=29) |
| **Lymph nodes** | 99 (N=15) | 93 (N=11) | 53 (N=10) | 404 (N=11) | 164 (N=10) |
| **Peritoneum** | 122 (N=12) | 55 (N=8) | NA | 0 (N=8) | 0 (N=2) |
| **Soft tissues** | 129 (N=9) | 2 (N=7) | 0, (N=7) | 2 (N=7) | 0 (N=7) |
