# Supplementary material for: Radiomics-based prediction of treatment response to TRuC-T cell therapy in patients with mesothelioma: a pilot study
Source: Research Square preprint supplement (doi:10.21203/rs.3.rs-3930436/v1), 2024-02-07
Supplement: Supplementary file 2 [file 340c2705c694dcb7a33bb0a9.docx]

**Table 5: Radiomics associated with diameter-based response of target tumor.**

| **Organ** | **Radiomics** | | | **DRadiomics** | |
| --- | --- | --- | --- | --- | --- |
| W4 | W8 | W12 | W8 | W12 |
| **Pleura** | 15 (N=47) | 7 (N=38) | 0 (N=29) | 81 (N=38) | 0 (N=29) |
| **Lymph nodes** | 76 (N=15) | 0 (N=11) | NA | 0 (N=11) | NA |
| **Peritoneum** | NA | NA | NA | NA | NA |
| **Soft tissues** | NA | NA | 1 (N=7) | NA | 0 (N=7) |
