# Supplementary material for: Radiomics-based prediction of treatment response to TRuC-T cell therapy in patients with mesothelioma: a pilot study
Source: Research Square preprint supplement (doi:10.21203/rs.3.rs-3930436/v1), 2024-02-07
Supplement: Supplementary file 3 [file 610af5773c1113a1e055ed8d.docx]

**Table 2: Response rate derived from tumor diameter**

|  | **Week 4** | **Week 8** | **Week 12** |
| --- | --- | --- | --- |
| **Pleura** | 83% (39/47) | 95% (36/38) | 97% (28/29) |
| **Lymph nodes** | 80% (12/15) | 91% (10/11) | **100% (10/10)** |
| **Peritoneum** | **100% (12/12)** | **100% (8/8)** | **100% (2/2)** |
| **Soft tissues** | **100% (9/9)** | **100% (7/7)** | 71% (5/7) |
| **All** | 87% (72/83) | 95% (61/64) | 94% (45/48) |
