# Supplementary material for: Radiomics-based prediction of treatment response to TRuC-T cell therapy in patients with mesothelioma: a pilot study
Source: Research Square preprint supplement (doi:10.21203/rs.3.rs-3930436/v1), 2024-02-07
Supplement: Supplementary file 4 [file a19bf483a296e96e7ea9c601.docx]

**Table 3: Response rate** **derived from tumor volume.**

|  | **Week 4** | **Week 8** | **Week 12** |
| --- | --- | --- | --- |
| **Pleura** | 30% (14/47) | 32% (12/38) | 28% (8/29) |
| **Lymph nodes** | 50% (7/15) | 55% (6/11) | 33% (3/10) |
| **Peritoneum** | 33% (4/12) | 25% (2/8) | **50% (½)** |
| **Soft tissues** | 33% (3/9) | 28% (2/7) | 15% (1/7) |
| **All** | 34% (28/83) | 34% (22/64) | 27% (13/48) |
