# Supplementary material for: Radiomics-based prediction of treatment response to TRuC-T cell therapy in patients with mesothelioma: a pilot study
Source: Research Square preprint supplement (doi:10.21203/rs.3.rs-3930436/v1), 2024-02-07
Supplement: Supplementary file 5 [file b75a0f0224bdfad4a25c5c94.docx]

**Table 4: Response rate of Mean SUV tumors responses.**

|  | **Week 4** | **Week 8** | **Week 12** |
| --- | --- | --- | --- |
| **Pleura** | 20.5% (8/39) | 58% (7/12) | 36% (9/25) |
| **Lymph nodes** | 64% (7/11) | **100% (1/1)** | 14% (1/7) |
| **Peritoneum** | 40% (4/10) | 34% (2/6) | **0% (0/1)** |
| **Soft tissues** | **0% (0/7)** | **0% (0/1)** | **0% (0/7)** |
| **All** | 67% (19/67) | 50% (10/20) | 25% (10/40) |
