# Supplementary material for: Radiomics-based prediction of treatment response to TRuC-T cell therapy in patients with mesothelioma: a pilot study
Source: Research Square preprint supplement (doi:10.21203/rs.3.rs-3930436/v1), 2024-02-07
Supplement: Supplementary file 6 [file c9bda25a4ce271c0f541a3c3.docx]

**Table 7: Radiomics features associated with PERCIST response of target tumors**.

| **Organ** | **Radiomics** | | **DRadiomics** | |
| --- | --- | --- | --- | --- |
| W4 | W12 | W4 | W12 |
| **Pleura** | 532 (N=39) | 209 (N=25) | 73 (N=39) | 71 (N=25) |
| **Lymph nodes** | 282 (N=11) | 53 (N=7) | 48 (N=11) | **NA** |
| **Peritoneum** | 89 (N=10) | NA | 278 (N=10) | NA |
| **Soft tissues** | NA | NA | NA | NA |
