# Supplementary material for: Radiomics-based prediction of treatment response to TRuC-T cell therapy in patients with mesothelioma: a pilot study
Source: Research Square preprint supplement (doi:10.21203/rs.3.rs-3930436/v1), 2024-02-07
Supplement: Supplementary file 7 [file f50fa5f388724073777d5e32.docx]

**Table 1: Distribution of target tumor localization by patient at baseline**

| **Tumor localization** | **Disease in patients** | **Numb. of patient with a unique disease** |
| --- | --- | --- |
| **Pleura** | 13 | 5 |
| **Lymph nodes** | 6 | 0 |
| **Peritoneum** | 8 | 3 |
| **Soft tissues** | 4 | 1 |
| **Miscellaneous** | 2 | 0 |
